# Supplementary material for: Eating Behaviors and Dietary Patterns of Women during Pregnancy: Optimizing the Universal ‘Teachable Moment’
Source: MDPI journal article supplement (doi:10.3390/nu13093298), 2021-09-21
Supplement: s1 [file s1]

**Table S1.** Significant relationships for women with obesity compared to normal-weight women.

| Eating behaviors <sup>a</sup> | Less vs. Maintain |           |                            | Less vs. More |           |                                | More vs. Maintain |           |                |
|-------------------------------|-------------------|-----------|----------------------------|---------------|-----------|--------------------------------|-------------------|-----------|----------------|
|                               | OR                | CI        | P-value                    | OR            | CI        | P-value                        | OR                | CI        | P-value        |
| Healthfulness of food         | 0.81              | 0.39-1.69 | 0.58                       | 1.73          | 0.87-3.44 | 0.12                           | 2.07              | 1.31-3.29 | <b>p=0.002</b> |
| Amount of food                | 0.29              | 0.12-0.63 | <b>p=0.002<sup>a</sup></b> | 0.23          | 0.11-0.47 | <b>p&lt;0.0001<sup>b</sup></b> | 0.75              | 0.46-1.22 | 0.25           |
| Size of meals                 | 0.51              | 0.30-0.86 | <b>P=0.012</b>             | 0.56          | 0.33-0.96 | <b>p=0.036</b>                 | 1.10              | 0.67-1.81 | 0.71           |
| Snacking frequency            | 0.34              | 0.14-0.84 | <b>p=0.019</b>             | 0.30          | 0.12-0.67 | <b>p=0.003</b>                 | 0.84              | 0.50-1.39 | 0.49           |
| Amount of fat                 | 0.45              | 0.24-0.85 | <b>p=0.014</b>             | 0.35          | 0.16-0.75 | <b>p=0.007<sup>c</sup></b>     | 0.75              | 0.45-1.27 | 0.28           |
| Amount of fried or fast foods | 0.55              | 0.35-0.88 | <b>p=0.012</b>             | 0.79          | 0.42-1.47 | 0.45                           | 1.30              | 0.71-2.38 | 0.39           |
| Amount of fruit               | 0.34              | 0.12-0.93 | <b>p=0.036</b>             | 0.31          | 0.12-0.79 | <b>p=0.015</b>                 | 0.81              | 0.52-1.27 | 0.36           |

<sup>a</sup>Partly determined by Caucasian race (3.40 [CI 1.45-8.02], p=0.005).

<sup>b</sup>Partly determined by higher education levels (0.46 [CI 0.22-0.95], p=0.035).

<sup>c</sup>Partly determined by Caucasian race (2.65 [CI 1.39-5.0], p=0.003).
